# Supplementary material for: Investigating the effect of hydrothermal carbonisation reaction times on the photoluminescence of bio-oil-derived carbon polymer dots
Source: Royal Society of Chemistry journal article supplement (doi:10.1039/d4tc03858d), 2024-12-03
Supplement: d4tc03858d1.pdf [file d4tc03858d1.pdf]

## Supplementary Material

### Investigating the Effect of Hydrothermal Carbonisation Reaction Times on the Photoluminescence of Bio-Oil- Derived Carbon Polymer Dots

Lawrence. A. Bruce<sup>a</sup>, Liam Desmond<sup>b</sup>, Abigail A. Seddon<sup>a</sup>, Leon Bowen<sup>c</sup>, Greg A. Mutch<sup>b</sup>, Anh N. Phan<sup>b</sup> and Elizabeth. A Gibson<sup>a</sup>

<sup>a</sup> Energy Materials Laboratory, Bedson Building, Newcastle University, Edward's Walk, Newcastle upon Tyne NE1 8QB, UK

<sup>b</sup> School of Engineering, Merz Court, University, Newcastle upon Tyne NE1 7RU, UK

<sup>c</sup> Durham University, Department of Physics, South Road, Co Durham, DH1 3LE, UK

Comment [LB]: 0009-0006-1785-5824

Comment [GM]: My ORCID is: 0000-0002-7267-3234

**Table S1:** synthesis approaches, size, optical properties, and proposed mechanism of PL for CDs synthesised from chitosan and chitin.

| Synthesis                                            | Size (nm)              | Proposed PL mechanism                                                                            | $\lambda_{\max}$ (nm)                      | Quantum yield (%) | Lifetime (ns)                                                                   | Reference |
|------------------------------------------------------|------------------------|--------------------------------------------------------------------------------------------------|--------------------------------------------|-------------------|---------------------------------------------------------------------------------|-----------|
| Chitosan<br>Microwave, HTC<br>180 °C, 600W           | 2.1<br>1.0<br>–<br>3.5 | Emission from the carbon core at short wavelengths<br><br>Emission shifts red upon N and P doing | 406 @ 320nm<br><br>Excitation dependent    | -                 | -                                                                               | 1         |
| Chitosan<br>HTC<br>190 °C, 15 h                      | 7<br>4 -<br>11         | Non-uniform size<br><br>Surface emission sites                                                   | 408 @ 330 nm<br><br>Excitation dependent   | 16.61             | -                                                                               | 2         |
| Chitosan & p-phenylenediamine<br>HTC<br>220 °C, 18 h | 1.2<br>–<br>2.6        | Surface emissive sites<br><br>Emission from carbon core                                          | 520 @ 390 nm<br><br>Excitation independent | 54                | -                                                                               | 3         |
| Chitosan<br>HTC<br>200 °C, 10 h                      | 2.13<br>0.5<br>- 4     | C=O/C=N is the luminescence centre of CD<br><br>Phosphorescence when immobilized in PVA          | 533 @ 457 nm<br><br>Excitation dependent   | 38                | CDs<br>1.24 (τ1)<br>15.69 (τ2)<br>CDs-PVA<br>0.03 s (59.25%)<br>0.45 s (40.75%) | 4         |
| Chitosan<br>HTC                                      | 2<br>1 –<br>4          | Non-uniform size<br><br>Surface emission sites                                                   | 410 @ 330 nm<br><br>Excitation             | –                 | –                                                                               | 5         |

|                                                   |                          |                                                                    |                                                        |              |                                    |    |
|---------------------------------------------------|--------------------------|--------------------------------------------------------------------|--------------------------------------------------------|--------------|------------------------------------|----|
| 180 °C, 24 h                                      |                          |                                                                    | dependent                                              |              |                                    |    |
| Chitosan and κ-carrageenan<br>HTC<br>220 °C, 18 h | 8<br>4 –<br>20           | Surface emission sites                                             | 420 @ 365 nm<br>Excitation dependent                   | 59           | 3.75 (τ1)<br>11.39 (τ2)            | 6  |
| Chitosan<br>HTC<br>180°C, 5h                      | 2 -<br>4                 | -                                                                  | 430 @ 330 nm<br>Excitation dependent                   | 18.9         | -                                  | 7  |
| Chitosan<br>HTC<br>180 °C 12 h                    | 5<br>4 –<br>7            | Surface emissive states                                            | 400 @ 280 nm<br>Excitation dependent                   | -            | -                                  | 8  |
| Chitosan<br>Chitin<br>HTC<br>EtOH 200 °C, 6h      | 8.31 ± 0.3<br>14.1 ± 2.4 | Emission from the hybridised carbon core<br>Surface emissive sites | ≈440 @ 360 nm<br>≈450 @ 380 nm<br>Excitation dependent | 13.4<br>11.6 | -                                  | 9  |
| Chitosan<br>HTC<br>200 °C, 12 h                   | 4.68 ± 1.09              | Non-uniform size<br>Surface emissive sites                         | 400 @ 320 nm<br>Excitation dependent                   | 13           | 3.2 (τ1)<br>7.87 (τ2)<br>0.48 (τ3) | 10 |
| Chitin<br>HTC<br>240°C, 10h                       | 4.21<br>1 -<br>7         | Surface emissive sites                                             | 430 @ 360 nm<br>Excitation dependent                   | 54           | -                                  | 11 |
| Chitin<br>Microwave HTC<br>180°C ,1000 W          | 2 -<br>12                | -                                                                  | 480 @ 370 nm<br>Excitation dependent                   | 5.1          | -                                  | 12 |
| Chitin<br>HTC 200°C, 8h                           | 2 -<br>8                 | -                                                                  | 405 @ 330 nm<br>Excitation dependent                   | 25.8         | -                                  | 13 |

**Table S2:** Yields of products from the pyrolysis of chitin.

| <b>Temperature (°C)</b> | <b>Bio-char (wt %)</b> | <b>Bio-oil (wt %)</b> | <b>Gas (wt %)</b> |
|-------------------------|------------------------|-----------------------|-------------------|
| 450 °C                  | 31.3                   | 36.4                  | 32.3              |
| 700 °C                  | 34.5                   | 50.1                  | 15.4              |

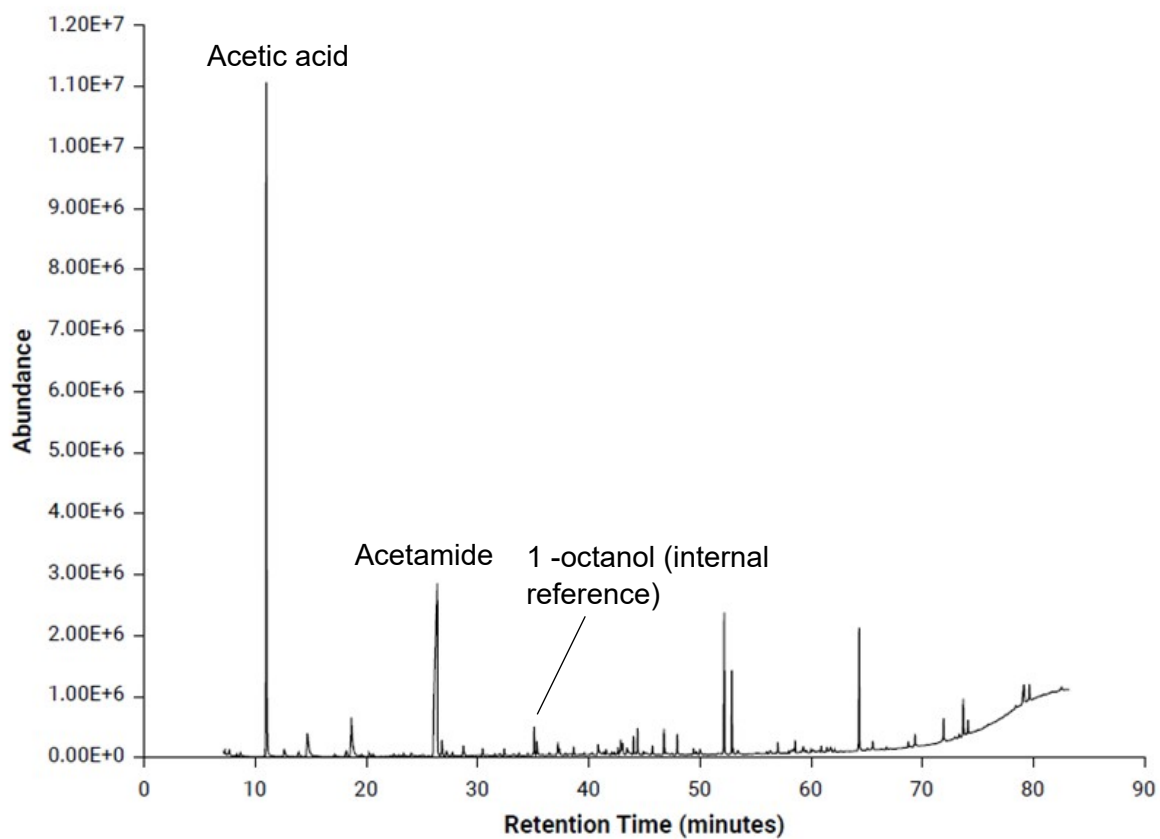

**Figure S1:** a) GC-MS Analysis (Single Quadrupole) of bio-oil from pyrolysis at 700 °C with a heating rate of with a heating rate of 10 °C/ min in acetyl nitrile with 1-octanol as an internal reference.

**Table S3:** Composition of of bio-oil obtained from pyrolysis of chitin at 700 °C with a heating rate of with a heating rate of 10 °C/ min in an inert environment.

| Name                                   | Retention time (min) | Quantifier ion (m/z) | Qualifier ion (m/z) |
|----------------------------------------|----------------------|----------------------|---------------------|
| Propane nitrile                        | 8.3                  | 54                   | 28                  |
| Acetic acid                            | 10.8                 | 43                   | 60                  |
| Oxazole,2,4-dimethyl                   | 12.6                 | 97                   | 42                  |
| Pyrazine                               | 13.9                 | 80                   | 53                  |
| Pyridine                               | 14.7                 | 79                   | 52                  |
| Propanoic acid                         | 17.1                 | 74                   | 73                  |
| 2-methyl pyridine                      | 18.8                 | 93                   | 66                  |
| 2,6-Lutidine                           | 22.4                 | 107                  | 32                  |
| Acetamide                              | 26.4                 | 59                   | 44                  |
| 2-Acetylfuran                          | 27.7                 | 95                   | 110                 |
| N-Methylacetamide                      | 28.7                 | 43                   | 73                  |
| <b>1-octanol (internal reference)</b>  | 35.1                 | 56                   | 70                  |
| 1,2-Cyclopentanedione, 3-methyl-       | 35.3                 | 112                  | 55                  |
| 2-Methylbenzoxazole                    | 37.2                 | 133                  | 64                  |
| 2-Acetyl pyrrole                       | 38.6                 | 94                   | 109                 |
| 4-methylphenol                         | 41.3                 | 108                  | 107                 |
| 4-amino pyridine                       | 42.9                 | 94                   | 67                  |
| Piconol                                | 44.0                 | 108                  | 109                 |
| Ethanone, 1-(1-methyl-1H-pyrrol-2-yl)- | 44.4                 | 108                  | 123                 |
| 3-Hydroxy-2-methylpyridine             | 45.7                 | 109                  | 80                  |
| 5- Hydroxy-2-methylpyridine            | 47.9                 | 109                  | 80                  |
| 2-Acetamidophenol                      | 49.4                 | 109                  | 151                 |
| 3-Acetamidopyridine                    | 64.3                 | 94                   | 136                 |

**Table S4:** GC-MS analysis of products identified in the organic phase during the purification of nitrogen-doped carbon polymer dots (N-CPDs). Following hydrothermal carbonization (HTC) at 200°C for 2 hours (2H-CPD), the N-CPDs were filtered, centrifuged, and washed with ether. The resulting organic phase was then analysed by GC-MS. The sample was prepared in acetonitrile, with isoamyl ether and methyl laurate used as internal standards.

| Name                                             | Retention time (min) | Quantifier ion (m/z) | Qualifier ion (m/z) |
|--------------------------------------------------|----------------------|----------------------|---------------------|
| <b><i>Isoamyl ether (internal standard)</i></b>  | 13.9                 | 70                   | 43                  |
| 3-Methyl-2-cyclopenten-1-one                     | 20.0                 | 96                   | 67                  |
| 3-Methyl-2-cyclopenten-1-one                     | 23.4                 | 112                  | 55                  |
| Phenol                                           | 23.4                 | 94                   | 66                  |
| 3-Aminopyridine                                  | 30.9                 | 94                   | 67                  |
| 3-Pyridinol, 2-methyl-                           | 34.5                 | 109                  | 80                  |
| 3-Hydroxypyridine                                | 35.6                 | 96                   | 41                  |
| 2(1H)-Pyridinone, 3,6-dimethyl-                  | 35.7                 | 123                  | 94                  |
| Phenol, 4-amino-                                 | 36.7                 | 109                  | 80                  |
| 2,6-Dimethoxyphenol                              | 39.5                 | 154                  | 139                 |
| <b><i>Methyl Laurate (internal standard)</i></b> | 41.7                 | 74                   | 87                  |
| 3-Acetamidopyridine                              | 52.1                 | 94                   | 136                 |
| 1,2,3-Benzenetriol                               | 55.6                 | 126                  | 52                  |
| 2-Acetamidophenol                                | 56.2                 | 109                  | 151                 |
| 3-Deoxy-D-gluconic acid                          | 61.1                 | 44                   | 54                  |

**Table S5:** GC-MS analysis of products identified in the organic phase during the purification of N-CPDs. Following hydrothermal carbonization (HTC) at 200°C for 4 hours (4H-CPD), the N-CPDs were filtered, centrifuged, and washed with ether. The resulting organic phase was then analysed by GC-MS. The sample was prepared in acetonitrile, with isoamyl ether and methyl laurate used as internal standards.

| Name                                             | Retention time (min) | Quantifier ion (m/z) | Qualifier ion (m/z) |
|--------------------------------------------------|----------------------|----------------------|---------------------|
| Propanoic acid                                   | 5.4                  | 74                   | 73                  |
| 2-methyl Pyridine                                | 5.9                  | 93                   | 66                  |
| <b><i>Isoamyl ether (internal standard)</i></b>  | 13.8                 | 43                   | 70                  |
| Acetamide                                        | 14.1                 | 59                   | 44                  |
| 2,3-Dimethylpyridine                             | 14.5                 | 107                  | 106                 |
| 2-Acetylfuran                                    | 15.2                 | 95                   | 110                 |
| N-Methylacetamide                                | 16.9                 | 43                   | 73                  |
| 2-Ethyl-6-methylpyrazine                         | 17.4                 | 121                  | 122                 |
| 2,3,5-Trimethylpyrazine                          | 17.6                 | 122                  | 42                  |
| 2,4,6-Trimethylpyridine                          | 17.8                 | 121                  | 120                 |
| 2,3-Dimethyl-2-cyclopenten-1-one                 | 19.6                 | 67                   | 110                 |
| 3-Methyl-2-cyclopenten-1-one                     | 19.9                 | 112                  | 55                  |
| 2-Cyclopenten-1-one, 2-hydroxy-3-methyl-         | 23.4                 | 112                  | 69                  |
| Phenol                                           | 26.0                 | 94                   | 66                  |
| 3-Aminopyridine                                  | 30.8                 | 94                   | 67                  |
| 3-methyl-2(1H)-Pyridinone,                       | 34.5                 | 80                   | 109                 |
| 6-methyl-3-Pyridinol                             | 36.7                 | 109                  | 80                  |
| <b><i>Methyl Laurate (internal standard)</i></b> | 41.7                 | 74                   | 87                  |
| 3-Acetamidopyridine                              | 51.9                 | 94                   | 136                 |
| 2-Methylbenzimidazole                            | 52.5                 | 132                  | 131                 |
| 2-acetamidophenol                                | 52.6                 | 109                  | 151                 |



**Table S6:** GC-MS analysis of products identified in the organic phase during the purification of N-CPDs. Following hydrothermal carbonization (HTC) at 200°C for 8 hours (8H-CPD), the N-CPDs were filtered, centrifuged, and washed with ether. The resulting organic phase was then analysed by GC-MS. The sample was prepared in acetonitrile, with isoamyl ether and methyl laurate used as internal standards.

| Name                                             | Retention time (min) | Quantifier ion (m/z) | Qualifier ion (m/z) |
|--------------------------------------------------|----------------------|----------------------|---------------------|
| 2-methyl-Pyridine                                | 5.9                  | 93                   | 66                  |
| <b><i>Isoamyl ether (internal standard)</i></b>  | 13.9                 | 43                   | 70                  |
| 3-Methyl-2-cyclopenten-1-one                     | 19.9                 | 96                   | 67                  |
| 2,3-dimethyl-2-Cyclopenten-1-one,                | 23.1                 | 67                   | 110                 |
| Phenol                                           | 26.0                 | 94                   | 66                  |
| 2-Methyl-5-(1-propenyl)pyrazine                  | 28.9                 | 133                  | 134                 |
| 3-Aminopyridine                                  | 30.8                 | 94                   | 67                  |
| Benzenamine, 4-methoxy-                          | 32.4                 | 108                  | 123                 |
| 3-amino phenol                                   | 34.4                 | 109                  | 80                  |
| 3-Pyridinol                                      | 35.2                 | 95                   | 32                  |
| 4-amino phenol                                   | 36.6                 | 109                  | 80                  |
| <b><i>Methyl Laurate (internal standard)</i></b> | 41.6                 | 74                   | 87                  |
| 2-Acetylpyrrole                                  | 43.3                 | 94                   | 109                 |
| Hydroquinone                                     | 44.5                 | 110                  | 81                  |
| 3-Acetamidopyridine                              | 51.9                 | 94                   | 136                 |
| 2-acetamidophenol                                | 56.2                 | 109                  | 151                 |

**Table S7:** Yields of bio-char and N-CPDs at different HTC holding times

| <b>Time (h)</b> | <b>Bio-char (wt %)</b> | <b>N-CPD (wt %)</b> | <b>Overall yield from chitin (wt %)</b> |
|-----------------|------------------------|---------------------|-----------------------------------------|
| 2               | 3.3                    | 3.5                 | 1.8                                     |
| 4               | 4.4                    | 2.2                 | 1.1                                     |
| 8               | 12.2                   | 8.8                 | 4.5                                     |

Quantum yield calculation:

The quantum yield was calculated at an excitation wavelength of 320 nm relative to quinine sulphate in 0.5 M H<sub>2</sub>SO<sub>4</sub> which has a quantum yield of 0.54.

$$\Phi_X = \Phi_R * \frac{I}{I_R} * \frac{OD_R}{OD} * \frac{n^2}{n_R^2}$$

$\phi$  = quantum yield of sample (X) or reference (R)

I = integrated fluorescence

n = refractive index of solvent

OD = absorbance at excitation wavelength

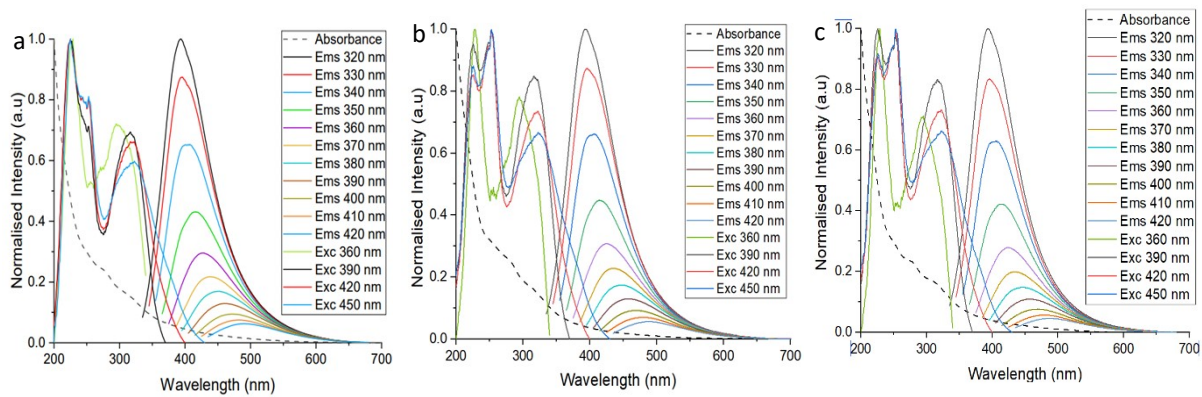

**Figure S2:** Optical properties of N-CPD dispersed in deionised water and sonicated for 20 minutes. a) 2H-CPD absorbance (dashed line), excitation (left) and emission (right). b) 4H-CPD c) 8H-CPD.

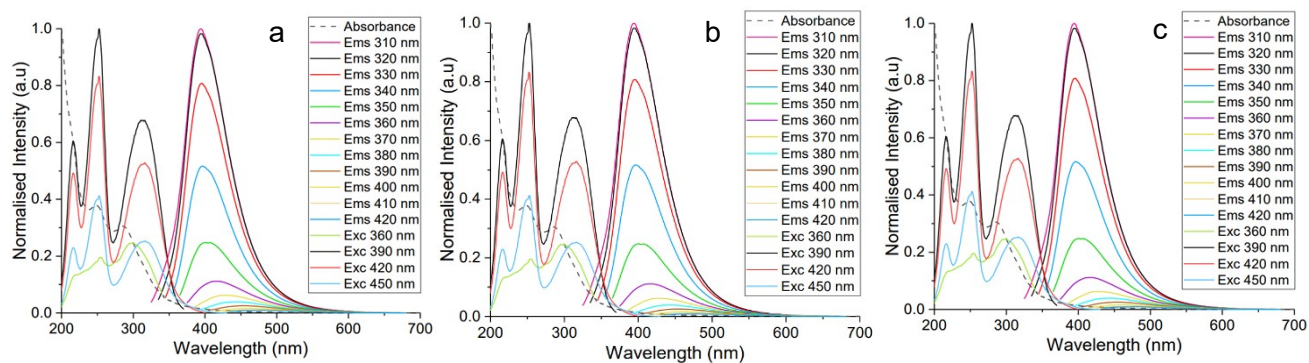

**Figure S3** Optical properties of the impurity fraction isolated after the 2-hour HTC dispersed in deionised water and sonicated for 20 minutes. a) 2H-CPD isolated impurity absorbance (dashed line), excitation (left) and emission (right). b) 4H-CPD isolated impurity c) 8H-CPD isolated impurity.

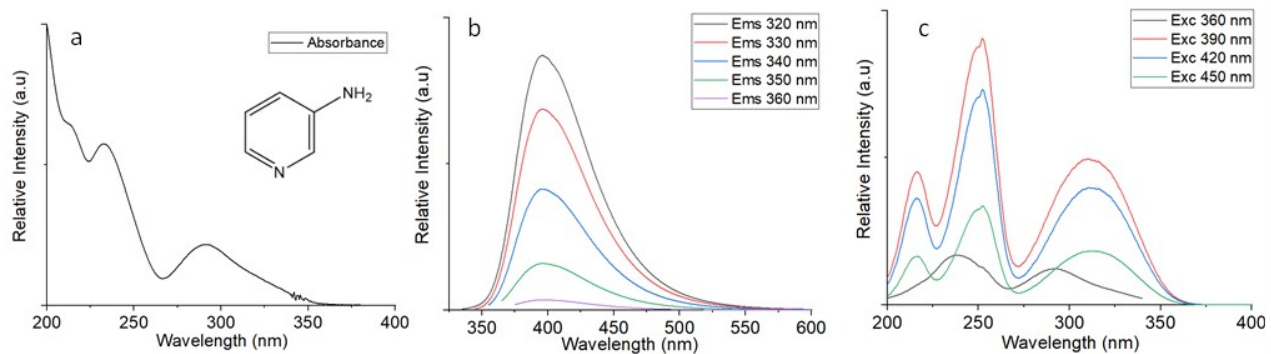

**Figure S4:** 3-aminopyridine was dissolved in deionised water a) absorbance, b) excitation-photoluminescence and c) excitation spectra.

## References

- 1 Q. Wu, S. Zhang, S. Li, Y. Yan, S. Yu, R. Zhao and L. Huang, *Nano Res.*, 2023, **16**, 1835–1845.
- 2 C. D. Yaqian Feng, Ruxue Li, Peng Zhou, *Microchem. J.*, 2022, **180**, 107627–107636.
- 3 X. Z. Jiyao Xu, Quan Qi, Lili Sun, Xiangjun Guo, Hongmei Zhang, *J. Alloys Compd.*, 2022, **908**, 164519.
- 4 Y. J. eyan Ni, Pingyan Zhou, Qiwen Jiang, Qi Zhang, Xingyu Huang, *Dye. Pigment.*, 2022, **197**, 109923.
- 5 M. M. F. C. Xiaojuan Gong, Wenjing Lu, Man Chin Paa, Qin Hu, Xin Wu, Shaomin Shuang, Chuan Dong, *Anal. Chim. Acta*, 2015, **861**, 74–84.
- 6 Z. X. Xu J, Wang Y, Sun L, Qi Q, *Int. J. Biol. Macromol.*, 2021, **191**, 1221–1227.
- 7 X. W. Yinyin Chen, Chenxi Zhao, Yanying Wang, Hanbing Rao, Zhiwei Lu, Changfang Lu, Zhi Shan, Bi Ren, Wei Wu, *Mater. Sci. Eng.*, 2020, **117**, 111264.
- 8 Y. Yang, J. Cui, M. Zheng, C. Hu, S. Tan, Y. Xiao, Q. Yang and Y. Liu, *Chem. Commun.*, 2012, **48**, 380–382.
- 9 J. Briscoe, A. Marinovic, M. Sevilla, S. Dunn and M. Titirici, *Angew. Chemie - Int. Ed.*, 2015, **54**, 4463–4468.
- 10 Z. Liang, M. Kang, G. F. Payne, X. Wang and R. Sun, *ACS Appl. Mater. Interfaces*, 2016, **8**, 17478–17488.
- 11 P. Z. Qiwen Jiang, Yi jing, Yeyan Ni, Ruoshi Gao, *Microchem. J.*, 2020, **157**, 105111.
- 12 M. A. Tina Naghdi, Mojgan Atashi, Hamed Golmohammadi, Iman Saeedi, *J. Ind. Eng. Chem.*, 2017, **52**, 162–167.
- 13 H. W. Gangaraju Gedda, Chun-Yi Lee, Yu-Chih Lin, *Sensors Actuators B Chem.*, 2016, **224**, 396–403.
